# Supplementary material for: A User's Guide to the NINDS rt-PA Stroke Trial Database
Source: PLOS journal article supplement (doi:10.1371/journal.pmed.0050113), 2008-05-13
Supplement: S1 (10.1371/journal.pmed.0050113.s001) [file journal.pmed.0050113.s001]

**File S1 – Methods of obtaining and deciphering NINDS database**

**Obtaining the NINDS Database**

A CD-ROM containing the NINDS trial data can be purchased from the National Technical Information Service (www.ntis.gov,1-888-584-8332, NTIS order number: PB2004-500031). The cost is $79.00 US dollars plus $5.00 for shipping and handling. Seven to ten business days for delivery can be expected.

**Software Requirements**

The "Read Me" instructions located on the CD state that both "data and

formats are stored in SAS transport format." This data must be converted into standard SAS files prior to use. A conversion, enterprise-level software is available through SAS Institute, Inc (www.sas.com) for this purpose. The company offers a free SAS data viewer which is available on their website for download after registration. This free viewer is not advertised and must be located on the company website.

The two files contained on the NINDS Data CD are distributed in an obsolete SAS Transport format (NINDS_rt-PA.xpt and formats.xpt) that can only be opened by the full, commercial SAS software product. These files cannot be viewed with the free viewer, but may be accessed after a request that the support staff convert the obsolete SAS files into a format readable by the free SAS viewer.

To allow data calculations, the dataset requires export to another format: a CSV format (comma separated values). It is useful to export this dataset along with headers for clarity purposes. Following these steps, the dataset may be viewed with the commercially available Excel program (Microsoft 2003, Microsoft Corp., Redmond, WA).

Though not fit for robust statistical analysis at this point, the data is readily accessible for evaluation by clinicians not comfortable with enterprise-level statistical software, or to those who do not have this software available.

**Additional Instructions**:

The Read Me instructions for the dataset also make the following points:

1) All patients over the age of 89, are recorded as “89”. Four patients in the dataset were recorded as “89”. This limitation prohibits any analysis related to age and cannot duplicate the results in published papers.

2) Time from stroke-onset to admission is documented as zero if the stroke occurred while the patient was hospitalized.

3) Admission blood pressure may be the designate for blood pressure on arrival in the Emergency Department, or ICU. This value represents the earliest blood pressure available and can also be the same measurement as the baseline blood pressure.

**Incomplete or Missing Data**

Incomplete or Missing data is identified as either “.” or the letter “B”.

**Decoding Data Variables**

No key accompanies the dataset to decode the numeric designations given to many of the variables. The numeric codes can be deciphered by either: 1) correlation with previous published data (Example: Race is coded 1-5, correlation with the percentages previously reported allowed determinations of which numeral represented a specific race), or 2) correlation with data elsewhere in the dataset (Example: Patients receiving rt-PA or placebo are coded as “1” and “2”; the patients’ coded as “1” had much higher rates of intracerebral hemorrhage and therefore represents those patients that received rt-PA). The method of decoding used by the authors is noted for each variable reported in the results.
