# Supplementary material for: A User's Guide to the NINDS rt-PA Stroke Trial Database
Source: PLOS journal article supplement (doi:10.1371/journal.pmed.0050113), 2008-05-13
Supplement: S2 (10.1371/journal.pmed.0050113.s002) [file journal.pmed.0050113.s002]

File S2: Complete rt-PA NINDS data base

A. History of Diabetes at Baseline (BDIAB)

**Code: Description of Code: Results:**

0 No diabetes 489

100 Presence of diabetes 131

B 4

B.History of Hypertension at Baseline (BHYPER)

0 No hypertension 209

100 Presence of hypertension 308

B 7

C. History of Myocardial Infarction at Baseline (BMI)

0 No myocardial infarction (MI) 464

100 Presence of MI 130

B 29

D. History of Angina at Baseline (BANGINA)

0 No myocardial infarction (MI) 466

100 Presence of MI 131

B 27

E. History of Congestive Heart Failure at Baseline (BCONG)

0 No CHF 497

100 Presence of CHF 99

B 28

F. History of Valvular Heart Disease at Baseline (BVAL)

0 No valvular heart disease 553 100 Presence of valvular heart disease 43

B 28

G. Aspirin Use prior to Randomization (ASPIRIN)

0 No Aspirin use 408 100 (+) aspirin use 216

H. Patient Reported Prior Stroke at Baseline (NSTHX)

0 No prior stroke 535 100 (+) previous stroke 83

B 6

I. Patient Reported Prior TIA at Baseline (NTIAHX)

0 No prior TIA 479 100 (+) previous TIA 99

B 46

J. Atrial Fibrillation at Admission (PATRIAL)

0 No atrial fibrillation at admission 504 100 (+) previous TIA 115

... 5

K.Treatment Code (TREATCD)

1 Received rt-PA 312 2 Received placebo 312

L. Smoking in Year prior to This Stroke (CURSMKER)

0 No smoking prior to stroke 400 100 (+) previous TIA 215

... 9

M. No Preexisting Disability at Baseline (NOPDIS)

0 (+) preexisting disability 48 100 No preexisting disability 576

N. Baseline Systolic BP (CSYS)

90 - 185 mmHg 584

187 - 227 mmHg 23

B 17

O. Baseline Diastolic BP (CDIA)

47 - 110 mmHg 591

111 - 134 mmHg 12

B 21

P. Patient's Gender (BGENDER)

1 Female 262

2 Male 362

Q. Patient's Race (BRACE)

1 Black 169

2 White 403

3 Hispanic 37

4 Asian 8

5 Other 7

R. Estimated Weight (kg) at Randomization (TWEIGHT): 39 - 179.5

S. Presumptive Diagnosis at Time of Treatment (TDX):

1 Small vessel occlusive 81

2 Cardioembolic 273

3 Large vessel occlusive 252

4 Other 18

T. Age in Years (AGE): 26.48 - 88.51, 4 patients categorized as 89 which represents all patients over the age of 89.

U.Actual Weight (kg) Measured after Randomization (WEIGHT): 41.17 -179.59

V. Glucose at Baseline (mg/dl) (LGLU):

> 50 to < 400 mg/dl 614

> 400 8

... 1

B 1

W. Fibrinogen at Baseline (mg/dl) (OFIBRIN):

10 to 719 mg/dl 570

... 15

B 39

X. Edema on Baseline CT (CTEDEMA):

1 Presence of edema 29

2 No evidence of edema 587

.... Not recorded 8

Y. Mass Effect on Baseline CT (CTMASSEF)

1 Presence of mass effect 22

2 No evidence of mass effect 594

.... Not recorded 8

Z. Center Of Randomization (RCENTCD)

1 39

2 62

3 72

4 146

5 150

6 ----

7 14

8 104

9 37

AA. Study Randomization Stratum (STRATUM)

1 0 – 90 minutes 302

2 91-180 minutes 322

AB. NIH Stroke Scale at 24 Hours (HOUR24)

0 NIH stroke scale 40

1 NIH stroke scale 29

2-8 NIH stroke scale 184

9-41 NIH stroke scale 369

42 Death 1

... Not available 1

AC. Any Hemorrhage during Trial (SYMP)

1 symptomatic 29

2 asymptomatic 39

... No hemorrhage 556

AD. Fatal Symptomatic Hemorrhage during Trial (SYFATAL)

1 fatal 11

2 nonfatal 57

... No hemorrhage 556

AE. Barthel Index at 6 Months (Intent to Treat) (BAR6M)

0 death 156

5- 90 not complete independence 207

95-100 favorable outcome 233

105 3

.... 15

AF. Rankin at 6 Months (Intent to Treat) (RANK6M)

0 no symptoms 92

1 favorable outcome 126

2-3 150

4-5 104

6 death 137

... 15

AG. Glasgow at 6 Months (Intent to Treat) (GOS6M)

1 favorable outcome 231

2 133

3-4 107

5 death 138

... 15

AH. Barthel Index at 12 Months (Intent to Treat) (BAR12M)

0 death 183

5- 90 not complete independence 323

95-100 favorable outcome 274

105 1

.... 26

AI.Rankin at 12 Months (Intent to Treat) (RANK12M)

0 no symptoms 94

1 favorable outcome 119

2-3 136

4-5 87

6 death 162

... 26

AJ. Glasgow at 12 Months (Intent to Treat) (GOS12M)

1 favorable outcome 235

2 106

3-4 95

5 death 162

... 26

AK. Rankin at 7-10 Days (Intent to Treat) (ARANKIN)

0 no symptoms 72

1 favorable outcome 83

2-3 114

4-5 350

6 death 39

... 5

AL. Rankin at 90 Days (Intent to Treat) (XRANKIN)

0 no symptoms 90

1 favorable outcome 126

2-3 146

4-5 144

6 death 118

... 0

AM.Glasgow at 90 Days (Intent to Treat) (XGOS)

1 favorable outcome 238

2 125

3-4 141

5 death 120

... 0

AN. NIH Stroke Scale at 90 Days (Intent to Treat) (NINETY)

0 NIH stroke scale 91

1 NIH stroke scale 79

2-8 NIH stroke scale 198

9-41 NIH stroke scale 136

42 Death 120

... Not available 0

AO. Barthel Index at 90 Days (Intent to Treat) (BNINETY)

0 death 145

5- 90 not complete independence 198

95-100 favorable outcome 281

105 0

.... 0

AP. Primary Cause of Death (PRIMARY_)

1 Cerebrovascular 54

2 Cardiovascular 70

3 Infection 36

4 Cancer 4

5 Respiratory 1

6 Other 3

Total 168

AQ. Days from randomization to death/censored (SURDAYS)

0 Days 1

1 2

2-90 115 =118

91-180 22 =140

181 - 365 169 = 309

366 - 1970 315 = 624

AR. Indicates if Patient Died during Trial Follow-Up(Yes=dead) (DCENSOR)

0 No death 456

1 Patient death 168

AS. History of Atherosclerosis at Baseline (BATHER)

0 Not present 367

1 (+) present 170

B Not recorded 87

AT. Admission Systolic BP (PSYS)

90 - 185 mmHg 525

187 - 254 mmHg 99

AU. Admission Diastolic BP (PDIA)

50 - 110 mmHg 580

111 - 180 mmHg 43

B 1

AV. Drink Alcoholic Beverages at Baseline (DRINK)

0 No 312

1 Yes 294

... Not recorded 18

AW. NIH Stroke Scale at Baseline (NIHSSB)

1 2

2 3

3- 8 141

9-37 478

AX. Patient Reported Prior Stroke or Old Stroke on Baseline CT (OSTRK)

0 No stroke 424

1 (+) stroke 200

AY. History of Other Cardiac Disease at Baseline (CARDIAC)

0 No cardiac disease 324

1 (+) cardiac disease 300

AZ. Early Ischemic Stroke CT Findings(Edema or Mass Effect or Midline Shift or Intravascular Thrombus)on Baseline CT (CTFIND)

0 Not present 512

1 (+) present 104

... Not available 8

BA. Early Ischemic Stroke CT findings(Edema or Mass Effect or Midline Shift)on Baseline CT (CTFIND2)

0 Not present 581

1 (+) present 35

... Not available 8

BB. Time from Stroke Onset to Treatment/Randomization (Minutes) (STARTMIN)

58-90 minutes 302

93 - 180 minutes 320

195 minutes 1

... 1

BC. Admission Temperature (ATEMP)

92.4 - 102.92 Farhenheit 583

... Not available 41

BD. Drinking Problem defined by Cage Questionnaire (BPROB)

0 not present 541

100 (+) present 56

B Not available 27

BE. History of Hyperlipidemia at Baseline (BCHOL)

0 not present 375

1 (+) present 131

B Not available 107

... Not available 1

BF.History of Hepatic disease at Baseline (BHEP)

0 not present 581

1 (+) present 18

B Not available 14

... Not available 1

BG. History of Malignancy at Baseline (BMAL)

0 not present 549

1 (+) present 59

B Not available 15

... Not available 1

BH. History of Hematological Disease at Baseline (BHEMA)

0 not present 595

1 (+) present 21

B Not available 7

... Not available 1

BI. Drink In Past 24 Hrs (BPRIOR)

0 not present 494

1 (+) present 101

B Not available 28

... Not available 1

BJ.Total Dose Delievered (mg) (based on estimated weight) (TDOSEDEL)

3 - 23 mg 6

35 - 90 mg 614

> 90 mg 3

... no data 1

BI. Heparin Use prior Baseline Stroke (HEPARIN)

0 not present 612

1 (+) present 11

... Not available 1

BL. Prosthetic Heart Disease at Admission (PPROS)

0 not present 618

1 (+) present 5

... Not available 1

BM. Calcium Channel Blocker at Baseline (PRECCB)

0 not present 468

1 (+) present 155

... Not available 1

BN. Baseline Pulse Pressure (PULSEBP)

24 - 146 mm HG 603

... not available 21

BO. Admission Pulse Pressure (APULSEBP)

9 - 160 mm Hg 622

... not available 2

BP. Hemorrhagic Infarctions during Trial (HEMINFAR)

... No hemorrhage 556

1 (+) Present 52

2 (-) Not present 16

BQ. Intracerebral Hematomas during Trial (INTRAMA)

... No hemorrhage 556

1 (+) Present 23

2 (-) Not present 45

BR. Hemorrhage (Symp. & Asymp.) during Trial (TYPE1HEM)

... No hemorrhage 556

1 (+) hemorhhage 68

BS. Time from Randomization to Hemrrohage(Minutes) (HEMMINS)

... No hemorrhage 556

+ 120 - 2160 minutes (36 hours) 43

+ 2161 - 4260 minutes (72 hours) 1

+ 4261 - 10,080 minutes (7 days) 12

+ 10,081 - 20,160 minutes (14 days) 4

+ 20,161 - 40,320 minutes (28 days) 2

+ 40,320 -277,619 (29 to 192 days) 6

BT. NIH Stroke Scale at 7-10 Days (SEVENTEN)

0 NIH stroke scale 75

1 NIH stroke scale 47

2-8 NIH stroke scale 185

9-41 NIH stroke scale 259

42 Death 41

... Not available 17

BU. Likeliest Clinical Classification of Ischemic Stroke Based on Post Treatment Data (could be influenced by treatment) (FLIKE)

1 Small vessel occlusive 61

2 Cardioembolic 241

3 Large vessel occlusive 125

4 Tandem lesion stroke 5

5 Stroke with normal arteries 9

6 Other identified cause 22

7 Unknown cause 152

... Not available 8

B Not available 1

BV. Old Lesion Volume at Baseline(missing set to zero if patient had baseline CT) (OLDVOL)

0 no presence 447

0.02 - 4.0 102

4.01 - 10.00 30

10.01 - 79.6 37

... not available 8

BW. 3 month Lesion Volume(Intent to Treat) (INT3MLES)

0 no presence 50

0.02 - 4.0 132

4.01 - 10.00 61

10.01 - 594 373

... not available 8

BX. Hyperdense Artery Sign on Baseline CT(reviewed with clinical information) (HYPERSGN)

1 (+) presence 91

2 not present 525

... not available 8

BY. Loss of Gray-White Matter Distinction (GWMD) on Baseline CT(reviewed with clinical information) (LOSSGRWT)

1 (+) presence 164

2 not present 452

... not available 8

BZ. Loss of GWMD over 33% of MCA on Baseline CT(reviewed with clinical information) (MCA33)

1 (+) presence 77

2 not present 539

... not available 8

CA. Presence of Hypodensity on Baseline CT(reviewed with clinical information) (HYPODENS)

1 (+) presence 51

2 not present 562

... not available 8

CB. Hypodensity over 33% of MCA on Baseline CT(reviewed with clinical information) (HYP33)

1 (+) presence 14

2 not present 602

... not available 8

CC. Compression of CSF Space on Baseline CT(reviewed with clinical information) (CSFCOMP)

1 (+) presence 89

2 not present 527

... not available 8

CD. Compression of CSF over 33% of MCA on Baseline CT(reviewed with clinical information) (CSF33)

1 (+) presence 54

2 not present 562

... not available 8

CE. Early CT Findings(excluding hyperdense artery sign(also called intravascular thrombus))on Baseline CT(reviewed with clinical information) (EARLYCTF)

1 (+) presence 194

2 not present 422

... not available 8

CF. Early CT Findings over 33% of MCA on Baseline CT(reviewed with clinical information) (EARLY33)

1 (+) presence 84

2 not present 522

... not available 8

CG. Time from stroke onset to CT scan at baseline (minutes) (ONSETCT)

0 minutes 6

1 minutes 2

13 - 30 minutes 14

31- 60 149

61 - 90 241

91-120 114

121 - 150 72

151-180 15

181 - 1438 3

... not available 8

CH. % of Correct Dose Administered (based on actual weight) (PHYGIVE)

5.6 - 50% 6

50.1 – 94.9% 79

95 - 105% 418

105.1 -159% 121

CI. Midline Shift on Baseline CT (CTMIDSHF)

1 (+) presence 1

2 not present 615

... not available 8

CJ. Hyperdense Ischemic Infarct on Baseline CT (CTHYPER)

1 (+) presence 1

2 not present 615

... not available 8

CK. Intravascular Thrombus on Baseline CT (CTTHROM)

1 (+) presence 80

2 not present 536

... not available 8

CL. Early CT Findings(Edema or Mass Effect or Midline Shift or Hyperdense Ischemic Infarct or Intravascular Thrombus) (FINDINGS)

1 (+) presence 104

2 not present 512

... not available 8

CM. Abnormal Baseline CT(Variable FINDINGS is Yes or Old Lesion at Baseline) (ABNORMAL)

1 (+) presence 254

2 not present 362

... not available 8

CN. Old Lesion Volume at Baseline with Missing Set to Zero (OVOLINT)

0 no presence 455

0.02 - 4.0 102

4.01 - 10.00 30

10.01 - 79.6 37

Note: 8 should be missing, set to zero

CO. The Place to Which Patient was Discharged after Initial Hospitalization (HDCHG)

1 Home 242

2 Relative/Friend 21

3 Rehab ilitation 206

4 Nursing Home 61

5 Death 75

6 Other 19

CP. Length of Hospital Stay from Admission to Discharge (Days) (los)

0 - 3 59

3-7 200

8-10 128

11 - 14 97

15 - 28 105

29 - 143 35

CQ New Ischemic Stroke (Reviewed at Coordinating Center) (NEWSTRK)

1 Not present 34

2 (+) present 590

CR. Time from Treatment/Randomization to New Ischemic Stroke (Days) (ttrtnewstrk)

0 - 7 days 9

8-30 9

31- 90 6

91-180 7

180 - 360 3

CS. Indicates if Baseline CT was of Sufficient Quality to Be Reviewed(Yes=reviewed) (ECT)

0 not sufficient quality to be reviewed 8

1 (+) sufficient quality to be reviewed 616

CT. Designation of Trial (Part I or II) (PART)

1 Part 1 291

2 Part 2 333

CU. Time from Stroke Onset to Admission(Seconds) (tonsetadmission)

-3000 1

-1550 1

0 17

120 - 300 sec (2-5 min) 12

301 - 600 (5-10min) 11

601 - 1800 (10-30min) 122

1801 - 3600 (30-60min) 275

3601 - 5400 (60-90 min) 116

5401 - 7200 (90-120min) 51

7201 - 9000 (120 - 150 min) 14

9001 - 10080 ( 150 - 180 min) 2

83,460 (1391 min = 23.18 hrs) 1

... not available 1

CV. Time from Admission to Treatment/Randomization(Seconds) (tadmissiontrt)

480 - 1800 (4-30min) 27

1801 - 3600 (30-60min) 257

3601 - 5400 (60-90 min) 221

5401 - 7200 (90-120min) 89

7201 - 9000 (120 - 150 min) 25

9001 - 10080 (150 - 180 min) 2

> 10,080 (> 180 min) 2

... not available 1
