# Supplementary material for: A User's Guide to the NINDS rt-PA Stroke Trial Database
Source: PLOS journal article supplement (doi:10.1371/journal.pmed.0050113), 2008-05-13
Supplement: S3 (10.1371/journal.pmed.0050113.s003) [file journal.pmed.0050113.s003]

**File S3: Results-Overview**

One hundred separate variables for the 624 patients enrolled in the NINDS study are recorded. Patient results can be divided into 9 natural groupings: A. Baseline characteristics, B. Patent demographics, C. Baseline vital signs and laboratory values, D. Head CT results, E. Treatment randomization and timing of drug delivery, F. Deleterious Effects (Death and hemorrhage), G. Neurological Outcomes, H. Dosing of tPA and use of heparin, I. Stroke type and Clinical Outcomes. Results for each of these groups is described.

***A. Baseline characteristics: File S4.***

Presence or absence of a baseline characteristic is designated as “0”, “1” or “100”. Correlation with Table 1 of the original NINDS trial publication (1) was used to determine that “0” denotes “not present” and “1” or “100” indicates the presence of an underlying condition or use of aspirin. The only exception to these designations is the measure, “No Preexisting Disability at Baseline” in which “0” denotes that an underlying disability is “present” at baseline and “100” denotes “no presence” of an underlying disability. File S4 contains the dataset for all baseline characteristics. Table S1 documents the baseline conditions available for review.

Table 1S: Baseline measures in NINDS rt-PA study

Reported in original publication (1), available in dataset

History of Diabetes at Baseline (BDIAB)

History of Hypertension at Baseline (BHYPER)

History of Myocardial Infarction at Baseline (BMI)

History of Angina at Baseline (BANGINA)

History of Congestive Heart Failure at Baseline (BCONG)

History of Valvular Heart Disease at Baseline (BVAL)

Aspirin Use prior to Randomization (ASPIRIN)

Patient Reported Prior Stroke at Baseline (NSTHX)

Patient Reported Prior TIA at Baseline (NTIAHX)

Atrial Fibrillation at Admission (PATRIAL)

Smoking in Year prior to This Stroke (CURSMKER)

No Preexisting Disability at Baseline (NOPDIS)

Not previously reported, available in dataset

History of Atherosclerosis at Baseline (BATHER)

Drink Alcoholic Beverages at Baseline (DRINK)

Patient Reported Prior Stroke or Old Stroke on Baseline CT (OSTRK)

History of Other Cardiac Disease at Baseline (CARDIAC)

History of Hyperlipidemia at Baseline (BCHOL)

History of Hepatic disease at Baseline (BHEP)

History of Malignancy at Baseline (BMAL)

History of Hematological Disease at Baseline (BHEMA)

Drink In Past 24 Hrs (BPRIOR)

Prosthetic Heart Disease at Admission (PPROS)

Calcium Channel Blocker at Baseline (PRECCB)

***B. Patient Demographics: File S5***

Patient race is coded 1 through 5. Correlation with Table 2 of the original NINDS trial publication was used to determine the correct designation for each race (1). Weight is recorded as both estimated and actual weights. Percentage of correct dose (of rt-PA) administered is based on actual weight.

# **C. Baseline vital signs and laboratory values: File S5**

Two separate blood pressures are recorded: “admission” and “baseline”. Brott, et al. noted the baseline blood pressure to be the reading at the time of randomization (15). Contact with the principal investigator (BCTilley) resulted in an updated readme.pdf document (not available with the purchased data set) which notes that the “baseline blood pressure” measurement “...could be and often was (obtained) after randomization”. Table 2S summarizes admission and baseline blood pressure values.

## Table 2S: Blood pressure measurements

BP systolic, mmHg BP Diastolic, mm Hg

90-185,(%) 187-254,(%) N.A,(%) 47-110,(%) 111- 180,(%) NA (%)

Admission 525 (84.1) 99 (15.9) 580 (92.9) 43 (6.9) 1 (0.02)

Baseline 584 (93.6) 23 (3.9) 17 (2.7) 591 (94.7) 12 (1.9) 21 (3.7)

Blood pressure recordings were previously reported as obtained every 15 minutes for the first 2 hours, then every 30 minutes from 2 to 8 hours and hourly from 9 to 24 hours after treatment (15). These blood pressure readings, as well as the 33 patients that received antihypertensive therapy, are not delineated in the available dataset.

Baseline glucose and fibrinogen levels, temperature and pulse pressure are present in the dataset. Other baseline laboratory measures reported in the original NINDS study (1) include: partial-thromboplastin time, prothrombin time and platelet counts. These values are not present in the available dataset.

***D. CT Scan results: File S7***

Of the 624 enrolled patients, 616 had CT results available for review. The published NINDS study (1) noted that CT scans were obtained at baseline, 24 hours and 7 to 10 days. The dataset reports CT scan results at baseline, “early” and 3 months; it is unclear whether the “early” designation represents CT scans obtained at 24 hours, 7 to 10 days, or both. Table 3S identifies the CT scan variables available for review.

Table 3S Available CT results in NINDS dataset

Radiologist blinded Baseline Early 3 months

Lesion Volume CN/BV BW**

Edema X *

Mass Effect Y *

Midline Shift CI *

Hyperdense Ischemic Infarct CJ *

Intravascular Thrombus CK *

Abnormality

(any 5 variables above *or* old infarct ) CM

*all 5 variables combined CL

* all variables except intravascular thrombus CE

*all variables combined except hyperdense ischemic infarct AZ

* edema, mass effect and midline shift combined BA

Scans reviewed with clinical information

Presence of Hypodensity CA

Hypodensity over 33% of MCA CB

Compression of CSF Space CC

Compression of CSF over 33% of MCA CD

Hyperdense Artery Sign BX

Loss of Gray-White Matter Distinction BY

Loss of GWMD over 33% of MCA BZ

Early CT Findings over 33% of MCA

(not defined) on Baseline CF

Letter designations correspond to column lettering in Excel spreadsheet format.

** intention to treat group

***E. Treatment randomization and timing of drug delivery: File S8.***

Randomization of patients to receive rt-PA and placebo are coded as “1” and “2”; respectively. Eight centers were involved in the NINDS trial. In the dataset, the centers are numbered 1- 5, then 7-9. Center #6 was closed after one to two patients were enrolled; these patients were transferred to another center. (personal communication, BC Tilley, 4/29/06)

While not described in the original publication, the NINDS trial included stratification on “time from stroke onset (to treatment)” into two groups: early (0 to 90 minutes) and late (91 to 180 minutes) (28). The early and later groups included 302 and 322 patients and are designated “1” and “2” respectively.

Table 4S documents the time from stroke onset to: 1) admission, 2) CT scanning and 3) randomization. In the time to onset to admission, 19 patients are designated as either “0” minutes or given negative values suggesting that they were already hospitalized at the time of the onset of their symptoms. Six additional patients are documented to have had “0” minutes from time of onset of symptoms to CT scanning suggesting these patients strokes were discovered while undergoing CT scanning.

Table 4S: Timing

Time from stroke onset to: Time from admission to:

Minutes Admission CT Scan Randomization

-50 – 0 2

0 17 6

1 – 10 23 2 1

10 – 30 122 14 26

31 – 60 275 149 257

61 – 90 116 241 221

91 –120 51 114 89

121 – 150 14 72 25

150 – 180 2 15 2

> 180 1 3 2

Not available 1 8 1

***F. Deleterious Effects (Death and hemorrhage): File S9.***

Patient follow-up occurred at 24 hours, 7-10 days, 3, 6 and 12 months. At 12 months, 168 of the 624 participants had died; however, review of neurologic outcomes at 12 months reveals that 26 patients were lost to follow-up. Therefore death rates should be based on the 598 patients available at follow up at 12 months.

The timing for the occurrence of death cannot be determined for certain in the purchased dataset. The variables “Indicates if Patient Died during Trial Follow-Up (Yes=dead)” and “Primary Cause of Death” both indicate that 168 deaths were recorded by 12 months. An additional category, “Days from randomization to death/censored” is contradictory, suggesting a number much higher than the 168 deaths reported in the other 2 categories.

Symptomatic intracerebral hemorrhage was recorded in 29 patients in this trial. The original NINDS publication reported 20 of 312 patients (6.4%) developed symptomatic intracerebral hemorrhage within 36 hours of receiving tPA, while 2 patients in the placebo arm developed this complication (1). When the 36-hour window is removed, a total of 25 patients in the tPA group (8.0%) and 4 patients in the placebo group (1.3%) developed intracerebral hemorrhage. Nine fatal intracerebral hemorrhages were recorded in those patients receiving tPA and 2 occurred in patients receiving placebo.

***G. Neurological Outcomes: File S10***

Table 5S reviews the neurologic scales utilized and when they were employed. Only the NIHSS is documented in the purchased dataset as being performed at baseline.

Table 5S: Neurologic Outcome Measures

NIH Stroke Scale

24hrs* 7-10d 90d 6mos 12mo

0 NIH stroke scale 40 91

1 NIH stroke scale 29 79

2-8 NIH stroke scale 184 198

9-41 NIH stroke scale 369 136

42 Death 1 120

... Not available 1 0

Barthel Index

0 death 145 156 183

5- 90 not complete independence 198 207 323

95-100 favorable outcome 281 233 274

105 0 3 1

.... Not available 0 15 26

Rankin Index

0 no symptoms 72 90 92 94

1 favorable outcome 83 126 126 119

2-3 114 146 150 136

4-5 350 144 104 87

6 death 39 118 137 162

... Not available 5 0 15 26

Glasgow Scale

1 favorable outcome 238 231 235

2 125 133 106

3-4 141 107 95

5 death 120 138 162

... 0 15 26

Note: All designated “Intent to treat” except *

***H. Dosing of tPA and use of heparin: File S11***

The milligram dose of tPA infused was recorded in all but one patient and the percentage of the correct dose that is reported in the dataset is based on actual patient weight. One-third of the patients (n=206) received at least 5% less than or greater than the correct dose based on actual weight, half of these (n=103, 16.5%) received at least 10% less than or more than the correct dose.

Despite being contraindicated, 11 patients received heparin. The dose and route of heparin administration is not recorded.

# **I. Stroke type and clinical outcomes: File S12**

Based on clinical assessment, four types of stroke were documented at the time of treatment and coded 1-4. Correlation with Table 5 in the original NINDS publication allowed for determination that “1” denotes small vessel occlusion, “2” large vessel occlusion, “3” cardioembolic and “4” represents “other stroke subtypes”. Post-treatment, 48.7% available patients were given a new diagnosis (300/615). The diagnoses post-treatment included the following new designations: “4” = Tandem lesion stroke, “5”= stroke with normal arteries, “6” = other identified cause and “7” = Unknown cause.

The admission and post-treatment diagnosis are listed in Table 6S. No information is available in the dataset addressing the timing for a post-treatment diagnosis.

## Table 6S: Admission and Post-treatment diagnosis

Clinical Classification Presumptive Diagnosis at: Likeliest ClinicalClassification

*Time of Treatment Based on Post Treatment Data*

1. Small vessel occlusive 81 61

2. Cardioembolic 273 241

3. Large vessel occlusive 252 125

4. Other (at time of treatment)/ 18

Tandem lesion stroke (Post-treatment) 5

5 Stroke with normal arteries 9

6 Other identified cause 22

7 Unknown cause 152

Not available 9

The site for patient discharge following initial hospitalization is coded 1 to 6. Contact with the principal investigator (BCTilley) provided an additional key (formats.xps) that was not included with the purchased dataset noting the following designations: “1” = “home”, “2” = Relative or friend, “3” = Rehabilitation facility, “4” = Nursing Home, “5” = Death and “6” = Other.
