# Supplementary material for: A User's Guide to the NINDS rt-PA Stroke Trial Database
Source: PLOS journal article supplement (doi:10.1371/journal.pmed.0050113), 2008-05-13
Supplement: S11 (10.1371/journal.pmed.0050113.s011) [file journal.pmed.0050113.s011]

File S11: Dosing and Heparin Use

BJ.Total Dose Delievered (mg) (based on estimated weight) (TDOSEDEL)

**Code: Description of Code: Results:**

3 - 23 mg 6

35 - 90 mg 614

> 90 mg 3

... no data 1

CH. % of Correct Dose Administered (based on actual weight) (PHYGIVE)

5.6 - 50% 6

50.1 – 94.9% 79

95 - 105% 418

105.1 -159% 121

BI. Heparin Use prior Baseline Stroke (HEPARIN)

0 not present 612

1 (+) present 11

... Not available 1
